# Supplementary material for: The Mechanism of Selective Recognition of Lipid Substrate by hDHHC20 Enzyme
Source: MDPI journal article supplement (doi:10.3390/ijms232314791), 2022-11-26
Supplement: s1 [file s1]

# Supplementary information

## The mechanism of selective recognition of lipid substrate by hDHHHC20 enzyme

Irina S. Panina<sup>1,2</sup>, Nikolay A. Kyrlov<sup>1,2</sup>, Anton O. Chugunov<sup>1,2,3,\*</sup>, Roman G. Efremov<sup>1,2,3</sup>, Larisa V. Kordyukova<sup>4</sup>

<sup>1</sup>Shemyakin-Ovchinnikov Institute of Bioorganic Chemistry, Russian Academy of Sciences, Moscow, Russia

<sup>2</sup>National Research University Higher School of Economics, International Laboratory for Supercomputer Atomistic Modelling and Multi-Scale Analysis, Moscow, Russia

<sup>3</sup>Moscow Institute of Physics and Technology (State University), Dolgoprudny, Moscow Region, Russia

<sup>4</sup>Belozersky Institute of Physico-Chemical Biology, Lomonosov Moscow State University, Moscow, Russia

\*Corresponding author. Email: [batch2k@yandex.ru](mailto:batch2k@yandex.ru)

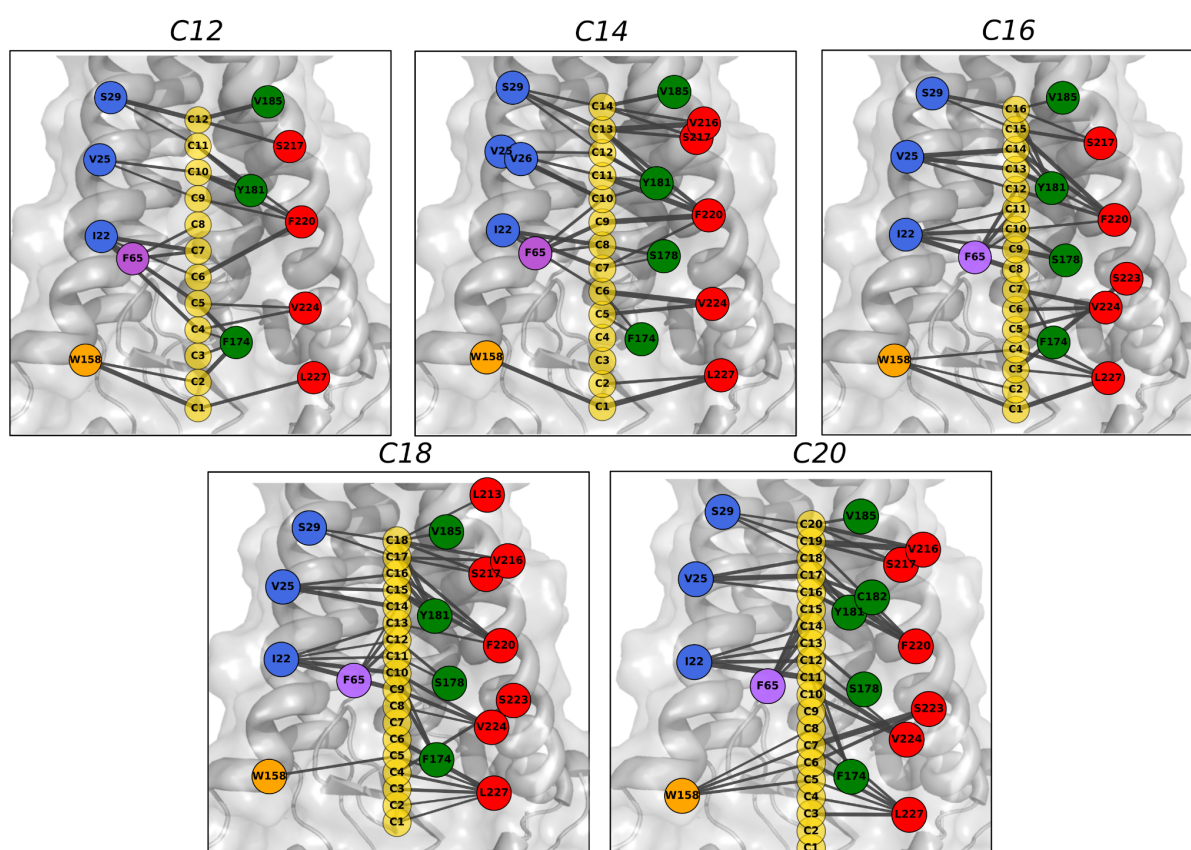

**Supplementary Figure S1. Acyl-CoA fatty residue contacts in hDHHC20 cavity during MD.**

Amino acid residues that form contacts with atoms C1–C16 of the ligand (yellow) for >50% of MD time are indicated and color-coded according to location in different TMHs: TMH-1 — *blue*; TMH-2 — *purple*; TMH-3 — *green*; TMH-4 — *red*. W158 near the active site is *orange*. It presumably forms the “entrance gate” to the enzyme cavity and often interacts with the lower part of the acyl tail. Linewidth of a contact is proportional to its lifetime. Interestingly, residues of TMH-2 interact least with the substrate, despite the abundance of large aromatic residues facing the cavity.

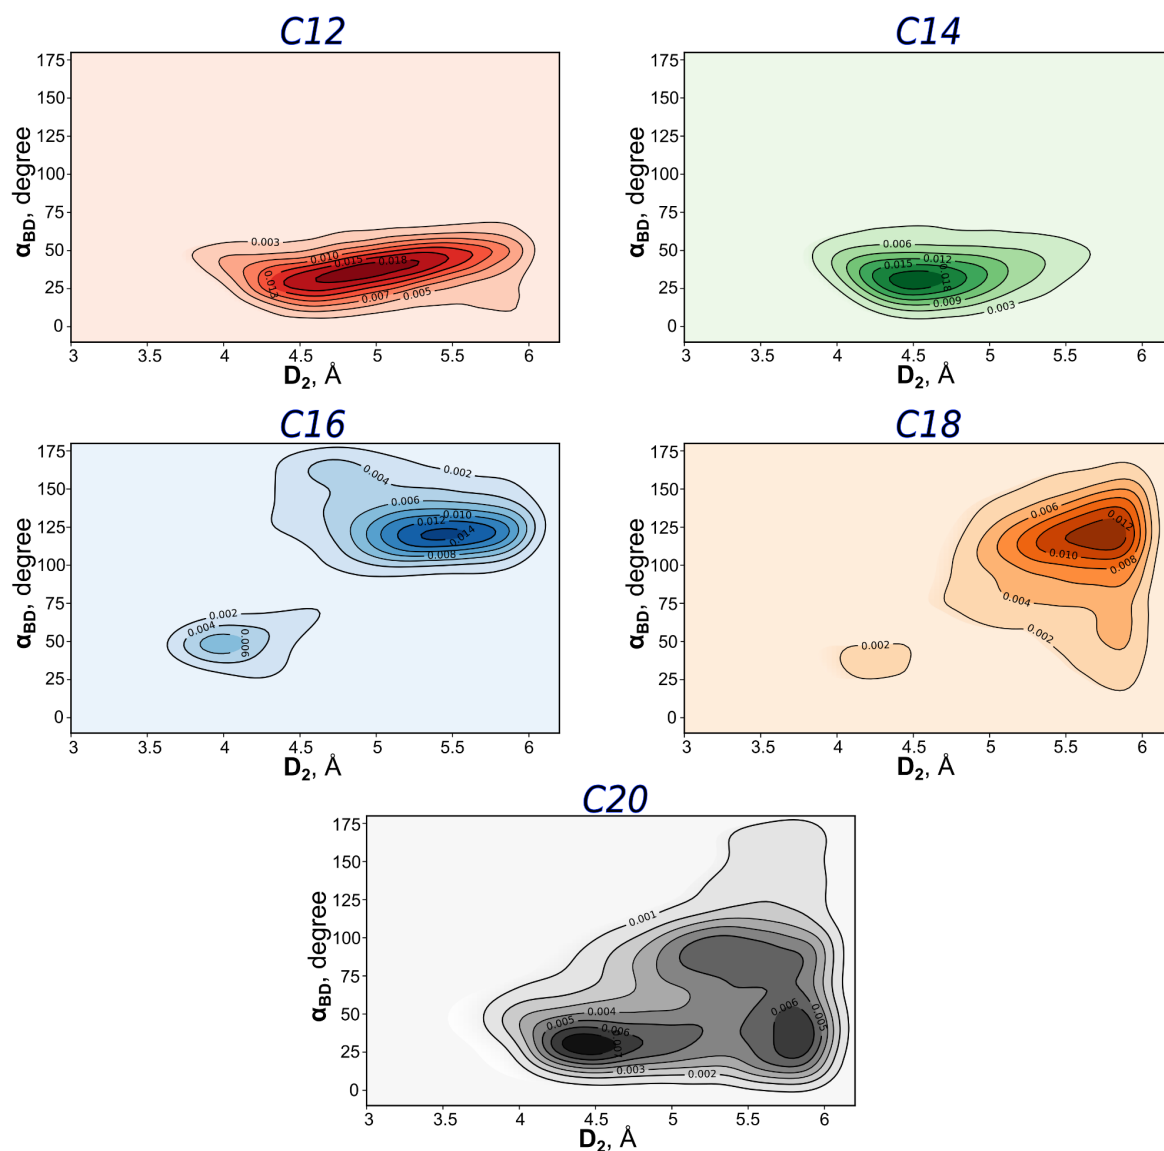

**Supplementary Figure S2. Reactivity of the enzyme-substrate complex during MD.** Each panel (C12–C20) is contoured 2D distribution of probability of the states, described by (1) the distance between S atom of the catalytic Cys<sup>156</sup> and carbonyl C atom of acyl residue ( $D_2$ ) and (2) the Bürgi–Dunitz angle ( $\alpha_{BD}$ ) of nucleophilic attack (see Fig. 2 for description of the parameters). Only  $D_2 < 6$  Å parts of all trajectories (replicas from the Table 1 joined) are shown here. We treat as reactive states with  $\alpha_{BD} > 90^\circ$ : note that C16 is the most reactive, then comes C18, where notable part of the states has  $\alpha_{BD} < 90^\circ$ .

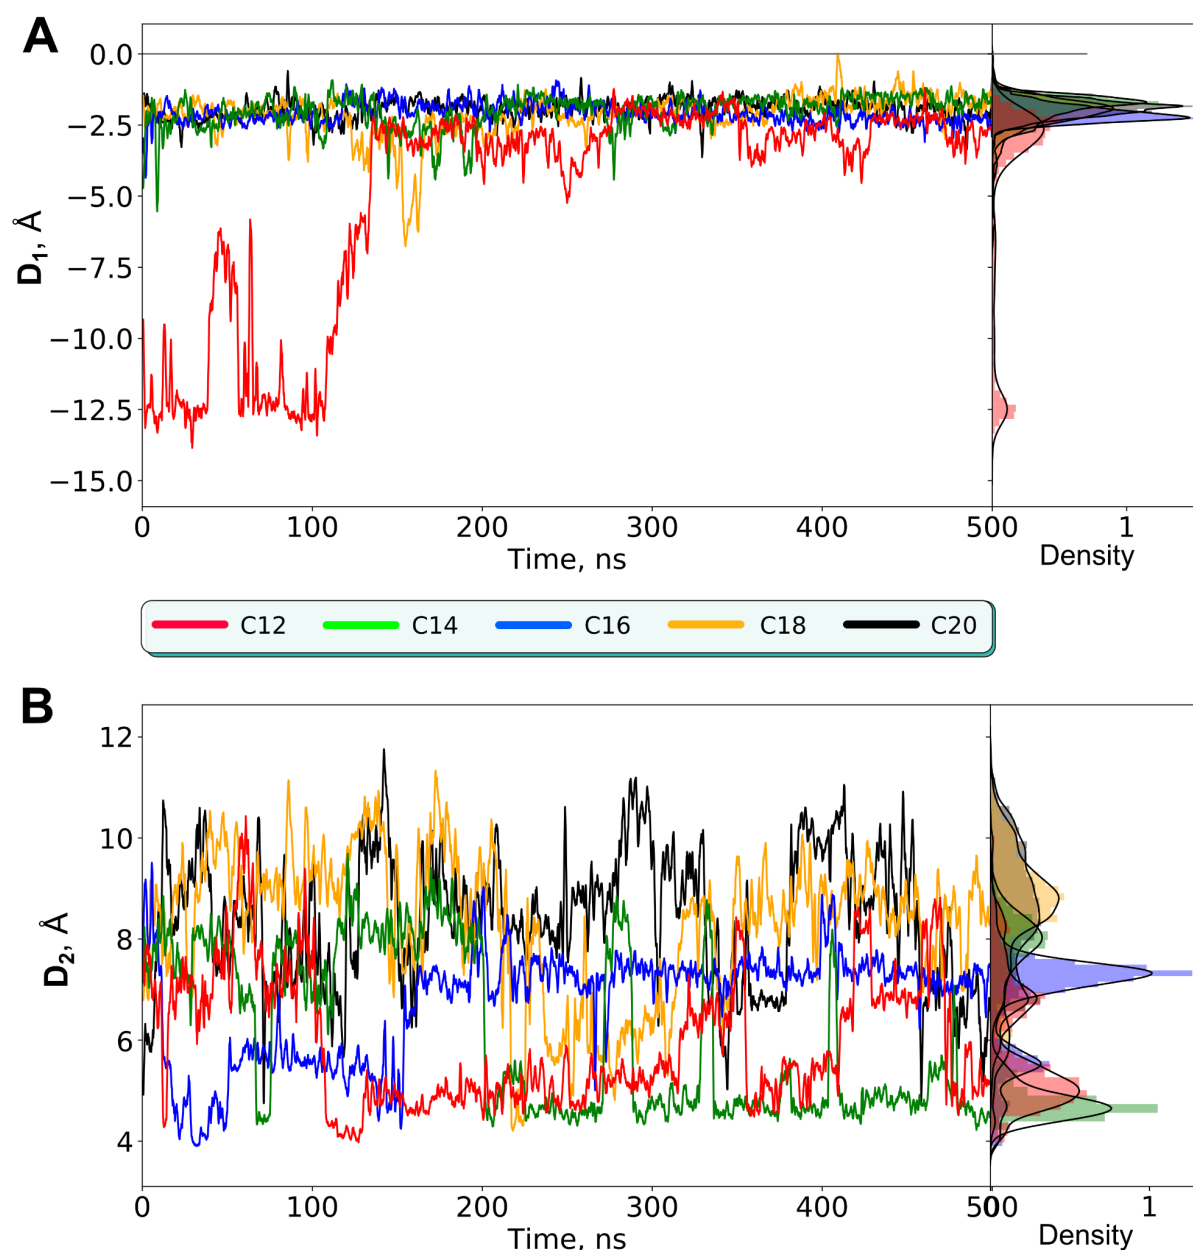

**Supplementary Figure S3. Time-averaged (in a 0.1 ns window) dynamic change of  $D_1$  (A) and  $D_2$  (B).** To the right, probability density functions are provided for a corresponding time series.

Calculations are performed on the representative set of trajectories and colored according to the *legend*. **A.**  $D_1 = 0$  is the ceiling level. Rare spike-like drops of  $D_1$  correspond to the partial exit of the substrate from the cavity. **B.**  $D_2$  under 6 Å (characteristic for a van-der-Waals contact) is one of the criteria of reactive states (see Fig. S2). Note that, although C12 and C14 may have low  $D_2$  values, these states cannot be considered as reactive due to the sharp angle of the nucleophilic attack ( $\alpha_{BD}$ ; see Fig. S2).

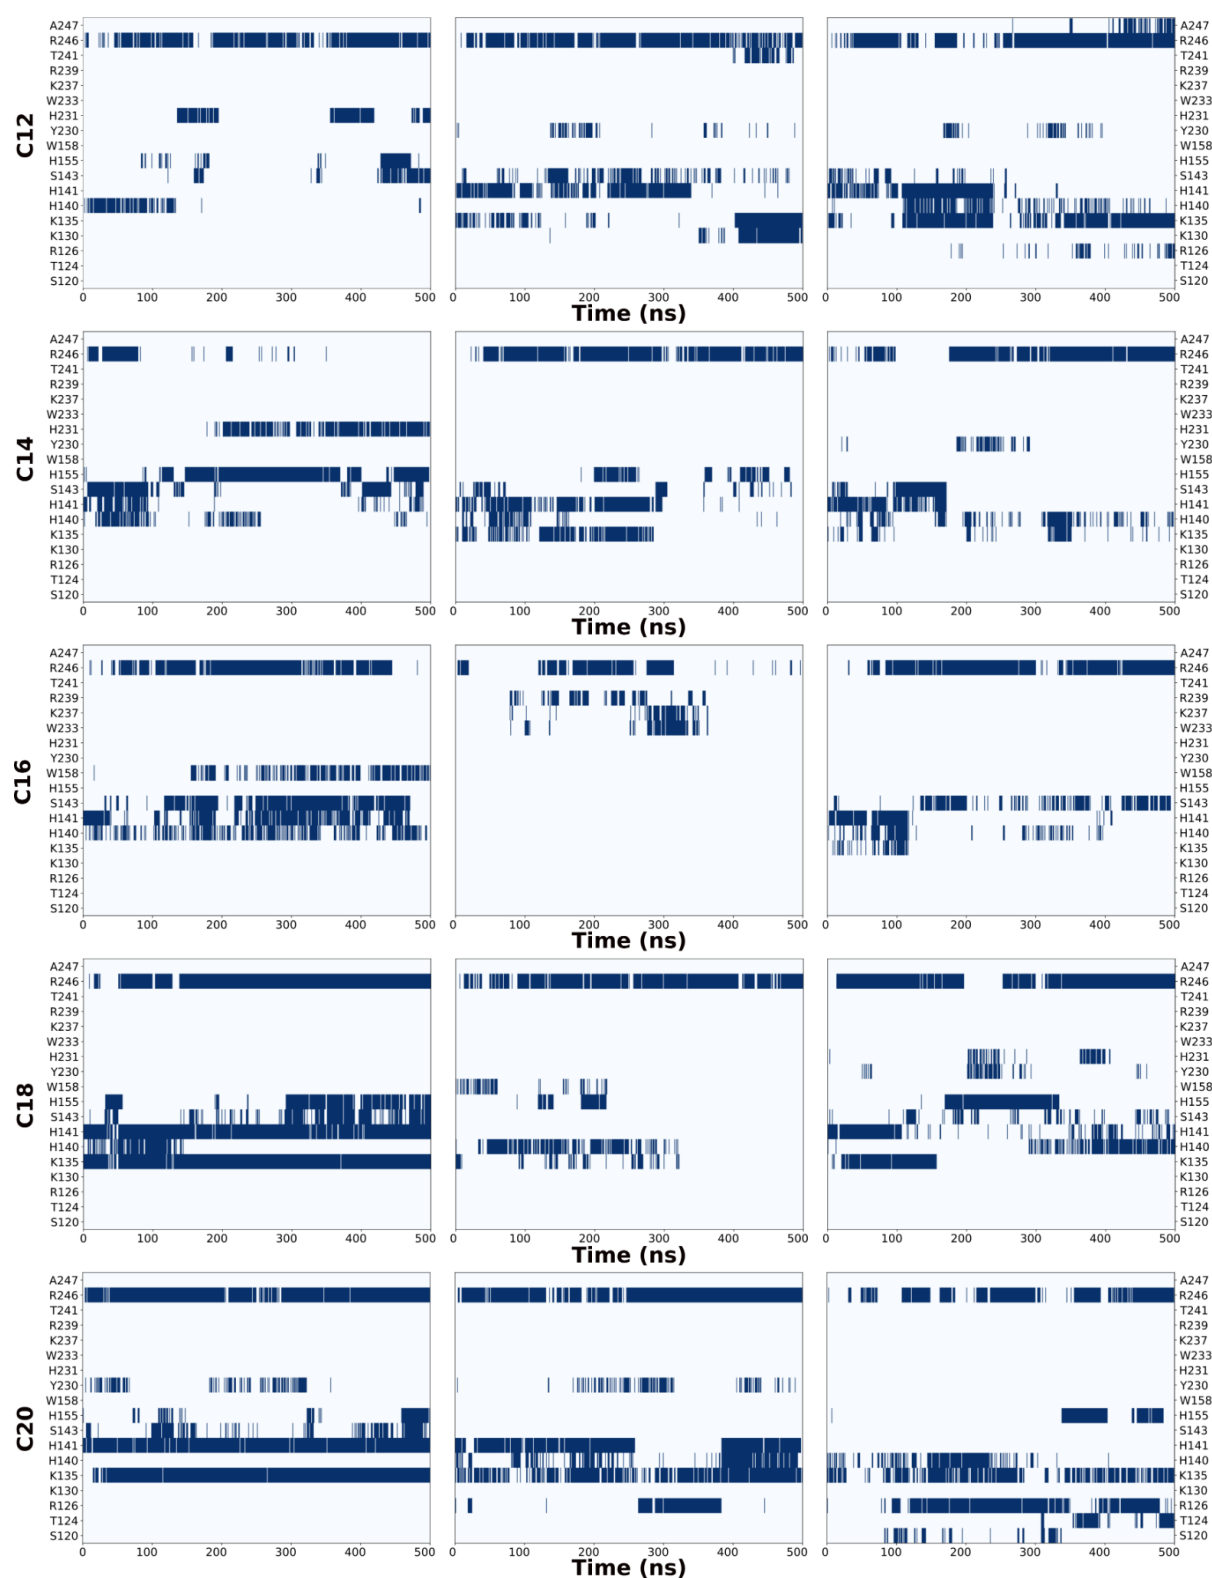

**Supplementary Figure S4. H-bonding in the hDHHC20/acyl-CoA complexes.** Each panel is a h-bond map between hDHHC20 and polar CoA head for given acyl chain length (C12–C20), in three replicas ((1)–(3), according to the Table 1). Blue hatches indicate h-bond between CoA and particular hDHHC20 residue (along the vertical axis) at a given MD time (along the horizontal axis). Only residues that form h-bonds with >10%-lifetime in at least one trajectory, are shown.

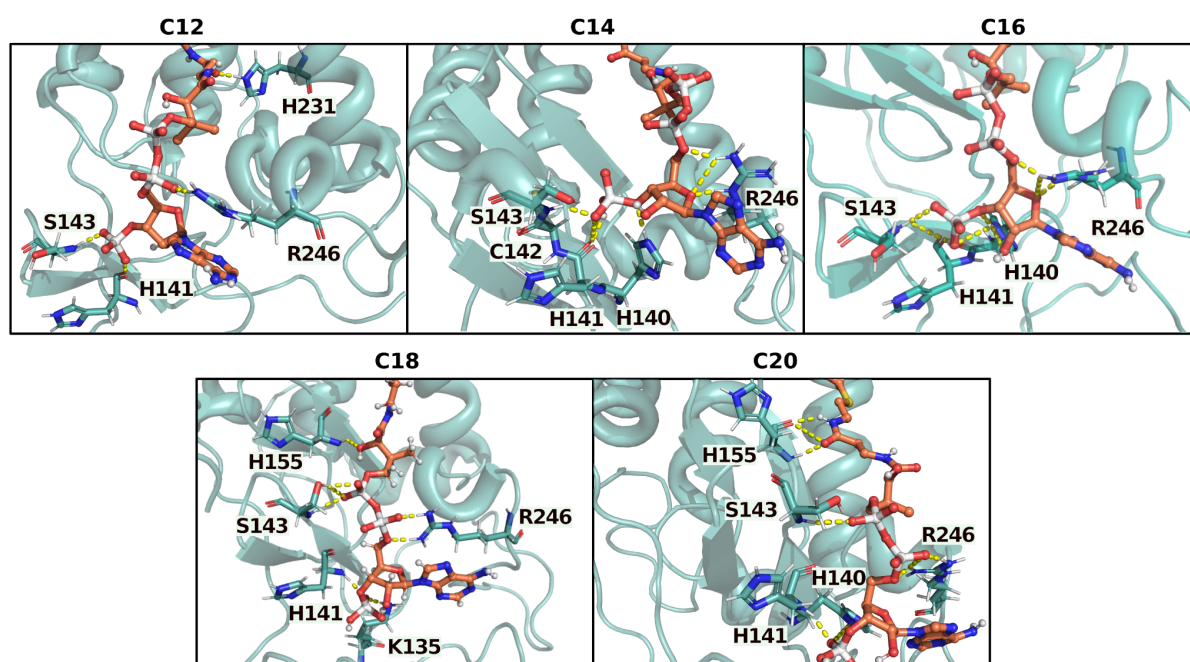

**Supplementary Figure S5. Final snapshots of the complexes after the MD, zoomed at the CoA head binding site.** The binding partners are shown as following: hDHC20 — *green ribbons*; C16-CoA — *orange balls & sticks*. Amino acid residues that bind acyl-CoA by h-bonds (*yellow dashes*) in MD structure, are shown with sticks.
